# Supplementary material for: Leveraging Large Language Models for Decision Support in Personalized Oncology
Source: PubMed Central journal article supplement (PMC10656647; doi:10.1001/jamanetworkopen.2023.43689), 2023-11-17
Supplement: jamanetwopen-e2343689-s002.pdf [file jamanetwopen-e2343689-s002.pdf]

## Data Sharing Statement

### Data

**Data available:** Yes

**Data types:** Deidentified participant data

**How to access data:** Data will be made available with supplementary files

**When available:** With publication

### Supporting Documents

**Document types:** Statistical/analytic code

**How to access documents:** [https://github.com/WangXII/LLMs\\_in\\_PO/](https://github.com/WangXII/LLMs_in_PO/)

**When available:** With publication

### Additional Information

**Who can access the data:** Data will be made available to anyone

**Types of analyses:** for non-profit purpose

**Mechanisms of data availability:** without investigator support
